# Supplementary material
Source: PubMed Central journal article supplement (PMC7726934)
Supplement: ao0c05168_si_001.pdf [file ao0c05168_si_001.pdf]

# Electronic Supplementary Information

## **Experimental and computational investigations of Carboplatin supramolecular complexes**

Sherif Ashraf Fahmy<sup>a</sup>, Fortuna Ponte<sup>b</sup>, Emilia Sicilia<sup>b</sup>, Hassan Mohamed El-Said Azzazy<sup>a,\*</sup>

a Department of Chemistry, School of Sciences & Engineering, The American University in Cairo, AUC Avenue, P.O. Box 74, New Cairo 11835, Egypt.

b Department of Chemistry and Chemical Technologies, University of Calabria, Arcavacata di Rende, 87036, Italy

\* Correspondence: hazzazy@aucegypt.edu (H.M.E.-S.A.); Tel.: +20-2-2615-2559 (H.M.E.-S.A.)

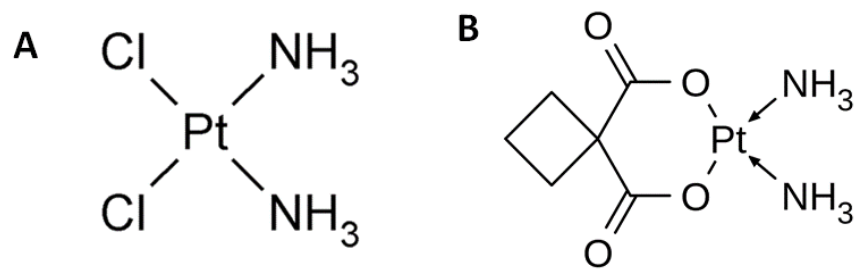

**Figure S1.** Chemical structures of (A) cisplatin and (B) carboplatin.

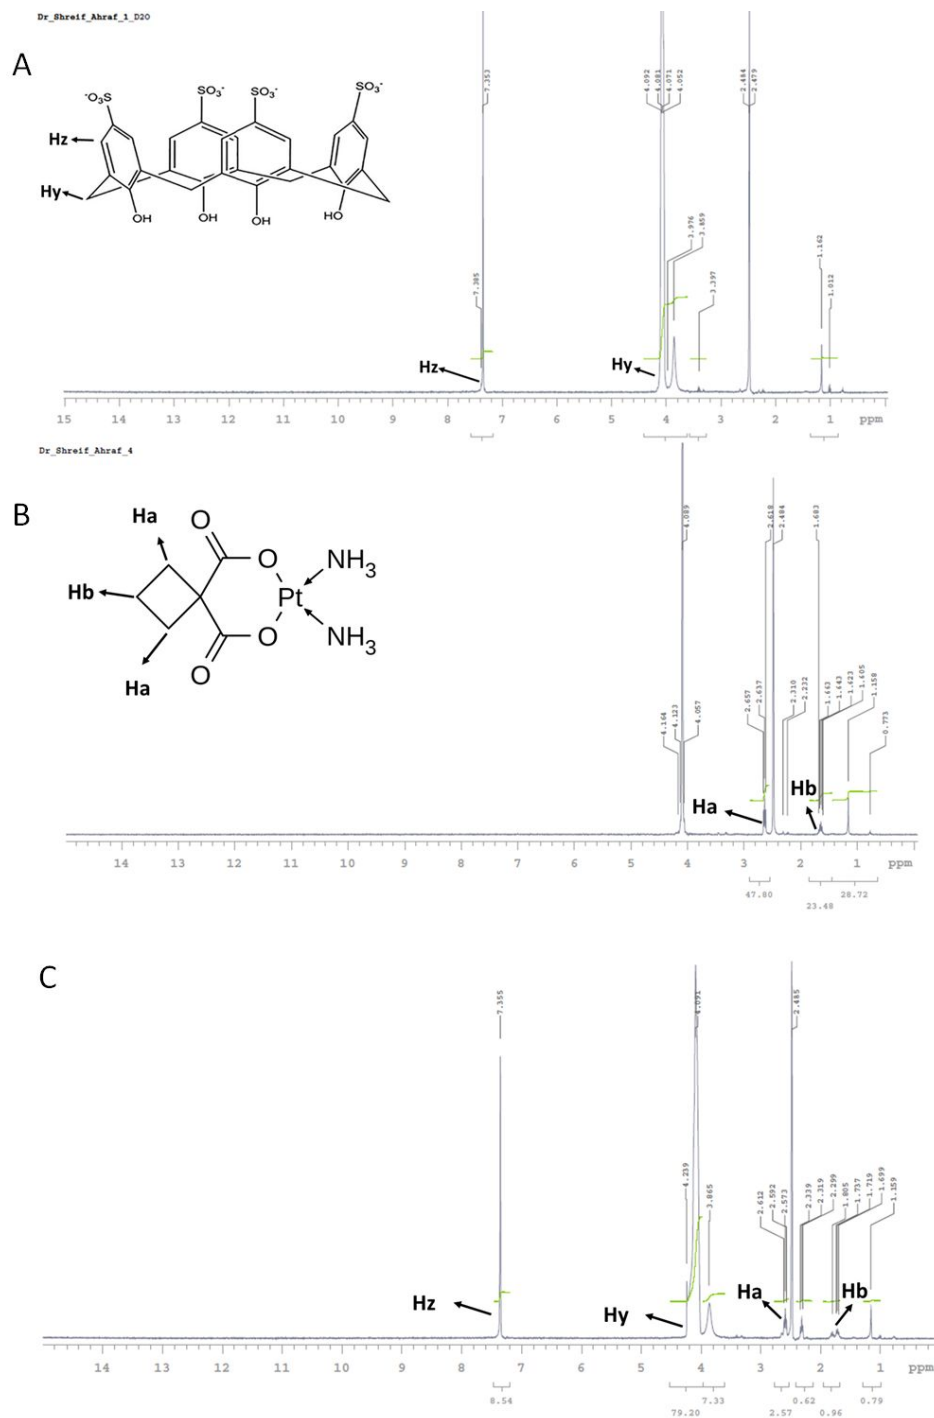

**Figure S2.**  $^1\text{H}$ NMR spectra of PS4 (A), carboplatin alone (B), and the equimolar ratio of carboplatin and PS4 (C).

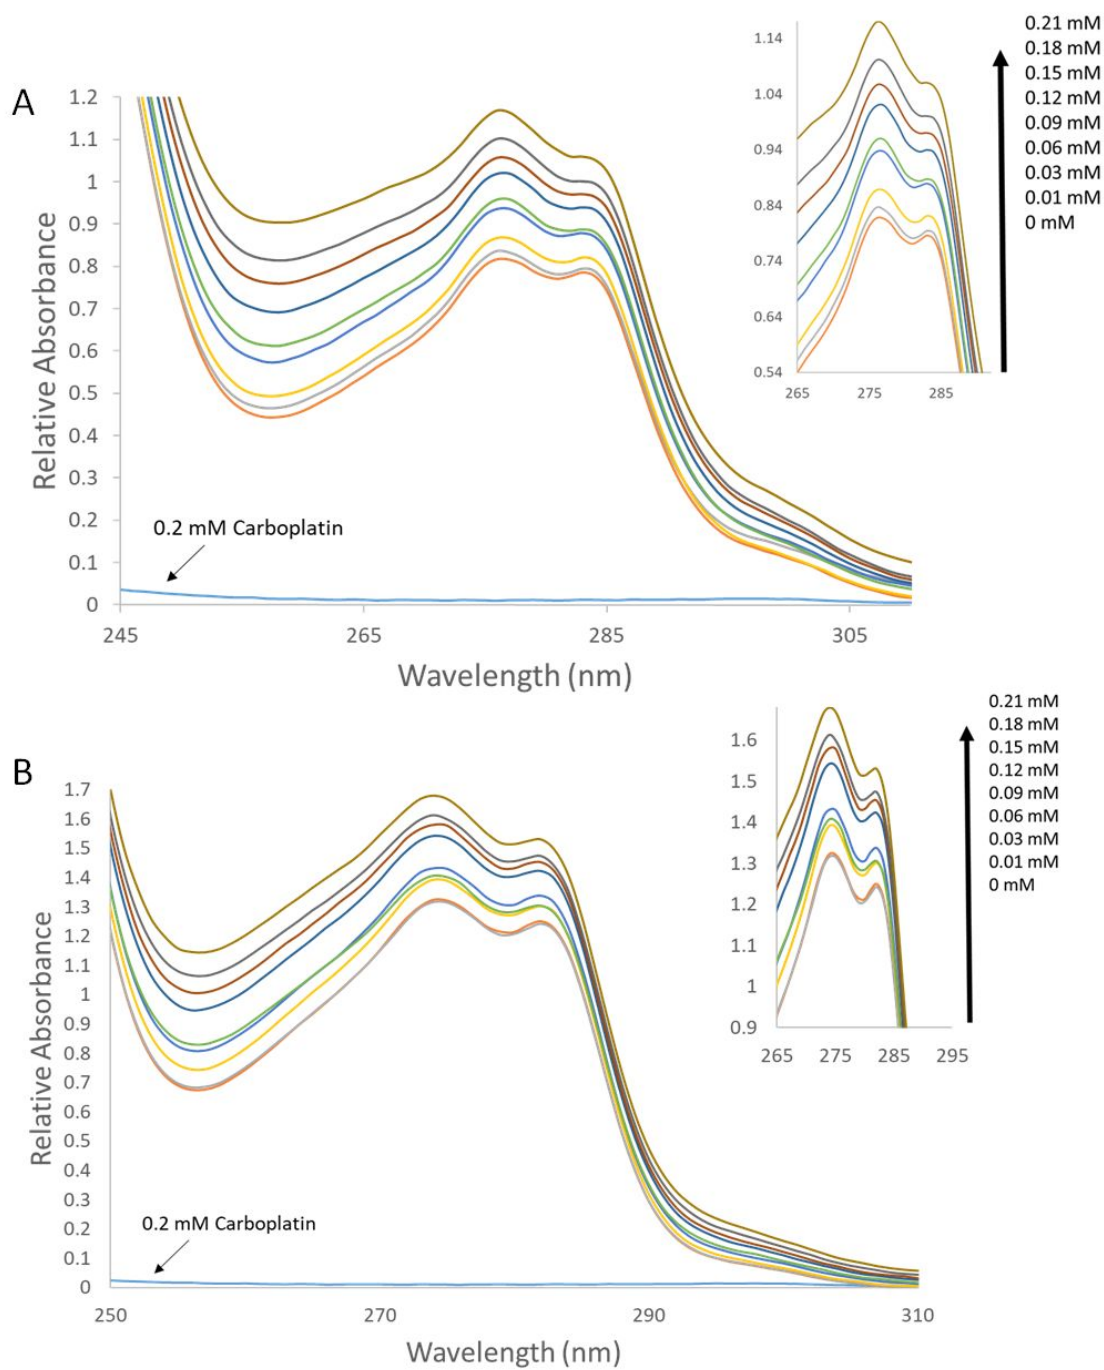

**Figure S3.** Zero Order spectra of (A) PS4/Carboplatin complex and (B) PS6/Carboplatin complex at varying concentrations.

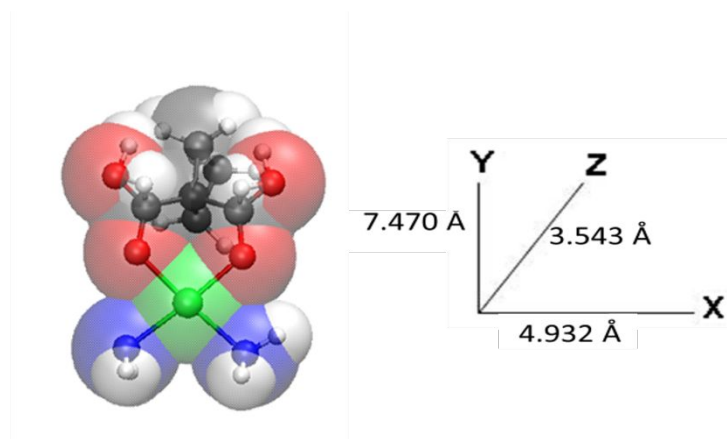

**Figure S4.** Calculated van der Waals surface for carboplatin and height, length and width (in Å) defining its size.
